CORRECTION

# Correction: Correction: Correction: Influenza Virus Targets Class I MHC-Educated NK Cells for Immunoavoidance

The *PLOS Pathogens* Staff

There is an error in the correction published on December 16, 2016. The incorrect figure legend was included in the correction. The correct figure legend and [Fig 1](#) are provided here. The publisher apologizes for the error.

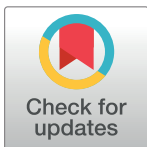

---

 OPEN ACCESS

**Citation:** The *PLOS Pathogens* Staff (2017) Correction: Correction: Correction: Influenza Virus Targets Class I MHC-Educated NK Cells for Immunoavoidance. *PLoS Pathog* 13(2): e1006210. doi:10.1371/journal.ppat.1006210

**Published:** February 15, 2017

**Copyright:** © 2017 PLOS Pathogens Staff. This is an open access article distributed under the terms of the [Creative Commons Attribution License](#), which permits unrestricted use, distribution, and reproduction in any medium, provided the original author and source are credited.

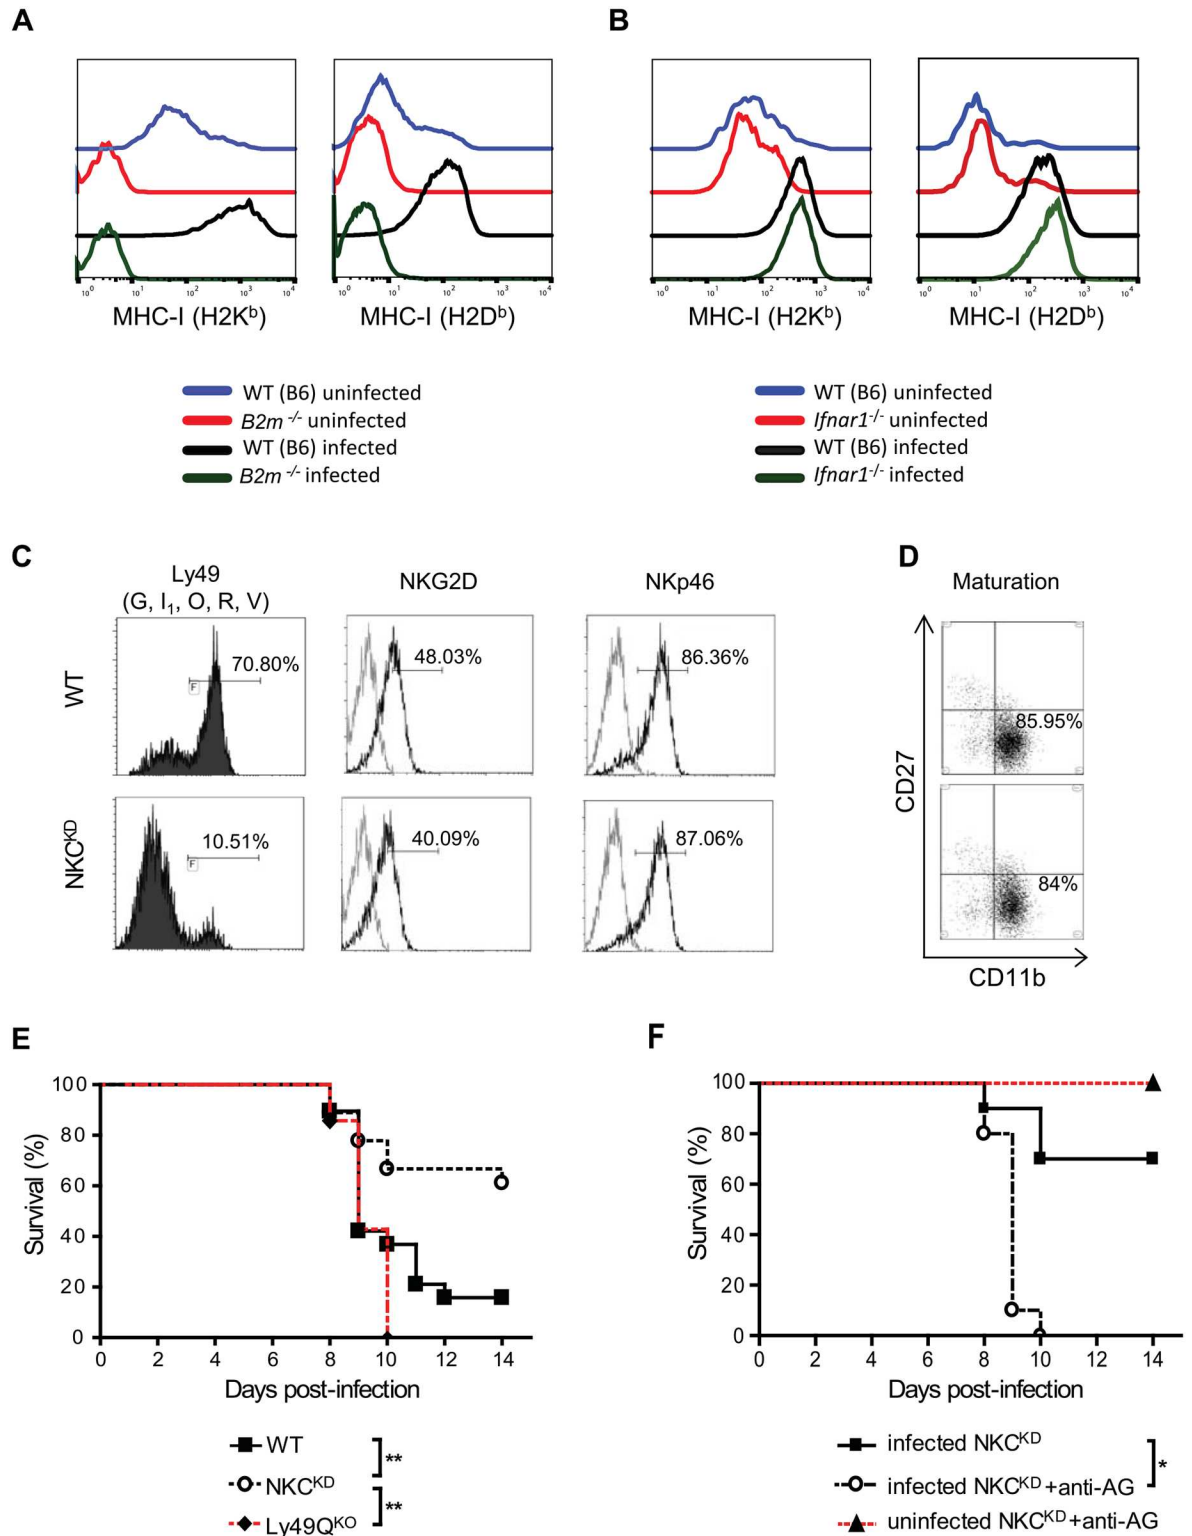

**Fig 1. Ly49-deficient mice are protected from lethal influenza infection.** (A, B) Groups of sex-matched WT (B6), *Ifnar1*<sup>-/-</sup> and *B2m*<sup>-/-</sup> mice were infected intranasally with 600 PFU of FM-MA virus. Single-cell suspensions were prepared from uninfected lungs and those infected with the virus for 5 days. Cells were stained with antibodies against H-2Kb or H-2Db and CD326 (EpCAM—epithelial cell marker), and analyzed by flow cytometry. Surface expression of H-2Kb or H-2Db was determined on EpCAM<sup>+</sup> lung epithelial cells. The following mAb were used in this experiment: anti-LFA-1, anti-EpCAM, anti-H-

2Kb, and anti-H-2Db. One representative image from each group is shown. This experiment was performed three times with similar results. **(C, D)** Ly49G, I1, O, R, and V expression was detected on lung NK cells of uninfected WT and NKCKD mice using anti-NKp46, anti-TCR $\beta$ , and a combination of 4D11, 4E5 and 14B11 mAb. NKG2D, NKp46, CD11b, and CD27 expression was detected on lung NK cells, defined using anti-CD49b (DX5) and anti-TCR $\beta$ . The gray line represents staining with an isotype antibody. This experiment was performed three times with similar results. **(E)** Groups of age and sex-matched WT, Ly49QKO, and NKCKD mice were infected with FM-MA virus (1050 PFU) and monitored for 2 weeks. Data are pooled from two independent experiments (n = 19 in each group). **(F)** Groups of age and sex-matched NKCKD mice with or without NK depletion by anti-asialoGM1 were infected and monitored as above. A group of uninfected, NK-depleted mice was included as a control (n = 10 in each group). The percentage of surviving mice is shown. \*p < 0.05, \*\*p < 0.01 and \*\*\*p < 0.001. Statistical analysis was performed with the log rank test.

doi:10.1371/journal.ppat.1006210.g001

## References

1. Mahmoud AB, Tu MM, Wight A, Zein HS, Rahim MMA, Lee S-H, et al. (2016) Influenza Virus Targets Class I MHC-Educated NK Cells for Immunoavoidance. *PLoS Pathog* 12(2): e1005446. doi: [10.1371/journal.ppat.1005446](https://doi.org/10.1371/journal.ppat.1005446) PMID: [26928844](https://pubmed.ncbi.nlm.nih.gov/26928844/)
2. Mahmoud AB, Tu MM, Wight A, Zein HS, Rahim MMA, Lee S-H, et al. (2016) Correction: Influenza Virus Targets Class I MHC-Educated NK Cells for Immunoavoidance. *PLoS Pathog* 12(11): e1006021. doi: [10.1371/journal.ppat.1006021](https://doi.org/10.1371/journal.ppat.1006021) PMID: [27814389](https://pubmed.ncbi.nlm.nih.gov/27814389/)
3. The PLOS Pathogens Staff (2016) Correction: Correction: Influenza Virus Targets Class I MHC-Educated NK Cells for Immunoavoidance. *PLoS Pathog* 12(12): e1006105. doi: [10.1371/journal.ppat.1006105](https://doi.org/10.1371/journal.ppat.1006105) PMID: [27992584](https://pubmed.ncbi.nlm.nih.gov/27992584/)
